# Supplementary material for: German translation and psychometric properties of the modified Gait Efficacy Scale (mGES)
Source: Springer Nature journal article supplement (doi:10.1007/s00391-019-01507-5), 2019-02-06
Supplement: MOESM1 [file 16448252]

**Supplementary material**

Supplementary Table: Items comprising the German version of the mGES (mGES-D)

| **1** | **Wie sicher fühlen Sie sich auf einer Holzbodenfläche zu gehen?** | |
| --- | --- | --- |
|  | *(How much confidence do you have that you would be able to safely walk on a level surface such as a hardwood floor?)* |  |
| **2** | **Wie sicher fühlen Sie sich auf einer Grasfläche zu gehen?** | |
|  | *(How much confidence do you have that you would be able to safely walk on grass?)* |  |
| **3** | **Wie sicher fühlen Sie sich ein Hindernis zu überqueren, welches sich über ihrem Weg befindet?** | |
|  | *(How much confidence do you have that you would be able to safely walk over an obstacle in your path?)* |  |
| **4** | **Wie sicher fühlen Sie sich von einem Bordstein runterzugehen?** | |
|  | *(How much confidence do you have that you would be able to safely step down from a curb?)* |  |
| **5** | **Wie sicher fühlen Sie sich auf einen Bordstein aufzusteigen?** | |
|  | *(How much confidence do you have that you would be able to safely step up onto a curb?)* |  |
| **6** | **Wie sicher fühlen Sie sich Treppen hochzugehen, wenn Sie sich am Handlauf festhalten können?** | |
|  | *(How much confidence do you have that you would be able to safely walk upstairs if you are holding on to a railing?)* |  |
| **7** | **Wie sicher fühlen Sie sich Treppen abzusteigen, wenn Sie sich am Handlauf festhalten können?** | |
|  | *(How much confidence do you have that you would be able to safely walk downstairs if you are holding on to a railing?)* |  |
| **8** | **Wie sicher fühlen Sie sich Treppen hochzugehen, wenn Sie sich nicht am Handlauf festhalten können?** | |
|  | *(How much confidence do you have that you would be able to safely walk upstairs if you are NOT holding on to a railing?)* |  |
| **9** | **Wie sicher fühlen Sie sich Treppen abzusteigen, wenn Sie sich nicht am Handlauf festhalten können?** | |
|  | *(How much confidence do you have that you would be able to safely walk downstairs if you are NOT holding on to a railing?)* |  |
| **10** | **Wie sicher fühlen Sie sich eine Strecke von 1 Km ohne Probleme zu gehen?** | |
|  | *(How much confidence do you have that you would be able to safely walk a long distance such as 1/2 a mile?)* |  |

*Note: Participants were asked to circle a number on a scale of 1 (“Gar nicht sicher”: no confidence) to 10 (“völlig sicher”: complete confidence) to indicate the degree of confidence that they felt they had in successfully completing each of the tasks as listed above.*
